# Supplementary material
Source: publisher figshare collection journal article supplement (https://tandf.figshare.com/ndownloader/files/14077631)
Supplement: Supplementary file 1 [file 14077631]

**Using renewables in panelboard resins to influence volatile organic compound emissions from panels**

**Kohta Miyamoto**2, **Warren Grigsby2 and** Shin-ichiro Tohmura1

**1. Forestry and Forest Products Research Institute, Tsukuba, Japan and 2. Scion, Rotorua, New Zealand**

**Supplementary Materials**

Table 1. Average bond ratings assessment of dry chisel testing plywood bondlines.

| **Panel** | **Average Dry Bond Rating*** |
| --- | --- |
| Veneer-only (neutral) | **-** |
| BioAdhesive 1 (acid) | 7 |
| Bioadhesive 2 (alkaline) | 8 |
| Soy Flour (neutral) | 6 |

* chisel testing undertaken according to AS/NZS2098:2:2012

Abundance

Figure 1. Representative GCMS chromatogram of the soy flour panel gaseous press emissions. Only the top 20 compounds were analysed.
